# Supplementary material
Source: Research Square preprint supplement (doi:10.21203/rs.3.rs-9365145/v1)
Supplement: Supplementary file 1 [file 9b69f98e5dab6b68650eaa22.pdf]

Supplementary Materials for

**Thermodynamic Optimization of Atomically Thin Iron-Based  
Compounds for Mid-Infrared Laser Power Scaling**

**This file includes:**

Supplementary Figs. 1 to 14

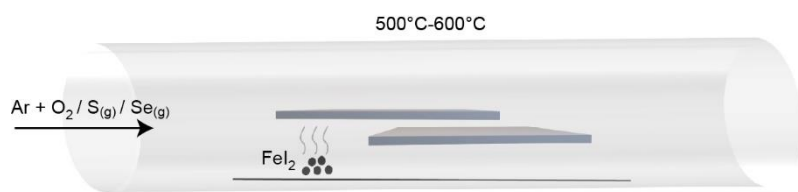

**Supplementary Fig. 1 | Schematic illustration of the synthesis process for 2D Fe-based crystals.**

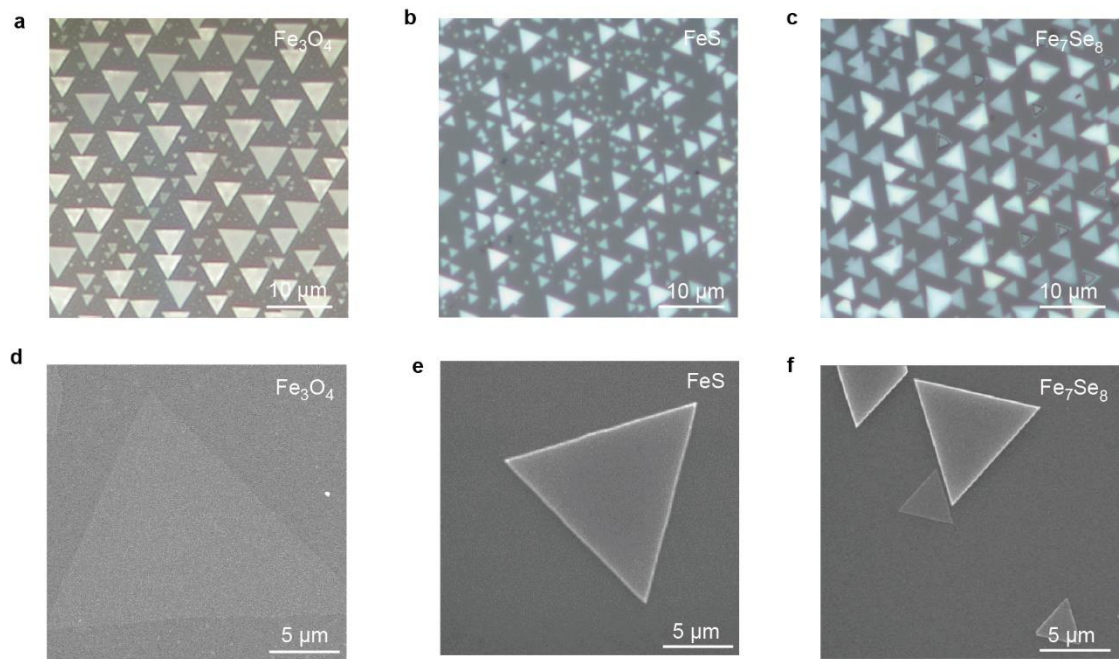

**Supplementary Fig. 2 | Morphology of synthesized 2D Fe-based crystals. a-c** OM and **d-f** SEM images of Fe<sub>3</sub>O<sub>4</sub>, FeS, and Fe<sub>7</sub>Se<sub>8</sub>, respectively.

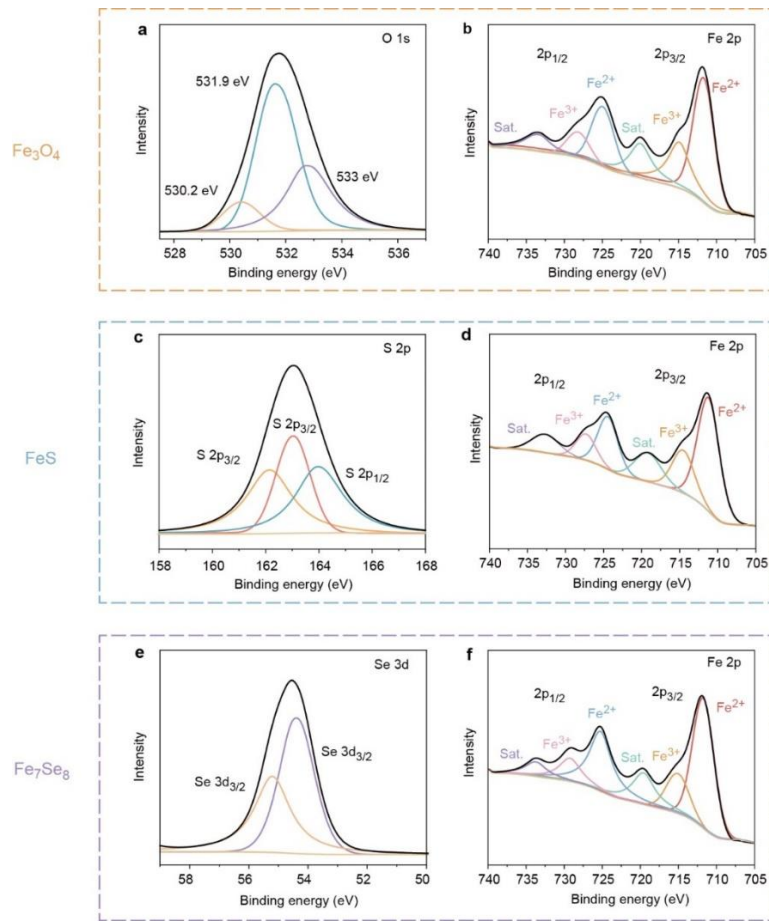

**Supplementary Fig. 3 | XPS analysis of 2D Fe-based crystals. a-b** Fe 2p and O 1s spectra of Fe<sub>3</sub>O<sub>4</sub>; **c-d** Fe 2p and S 2p spectra of FeS; **e-f** Fe 2p and Se 3d spectra of Fe<sub>7</sub>Se<sub>8</sub>.

The bonding states and composition of the 2D Fe-based (Fe<sub>3</sub>O<sub>4</sub>, FeS, Fe<sub>7</sub>Se<sub>8</sub>) crystals were further confirmed by X-ray photoelectron spectroscopy (XPS), as shown in Figure S3. The binding energies at ~725.9 and ~712.3 eV correspond to Fe<sup>3+</sup>, while the peaks at ~722.9 and ~709.8 eV are assigned to Fe<sup>2+</sup>, consistent with previously reported XPS characteristics of 2D Fe<sub>3</sub>O<sub>4</sub>, FeS and Fe<sub>7</sub>Se<sub>8</sub> crystals. For Fe<sub>3</sub>O<sub>4</sub>, three distinct peaks located at 530.33, 531.63, and 532.73 eV confirm the presence of O 1s. For FeS, the peaks at 163.95 eV and 162.1 eV in the S 2p orbital are attributed to the S 2p<sub>1/2</sub> and S 2p<sub>3/2</sub> states, respectively. In Fe<sub>7</sub>Se<sub>8</sub>, the peaks at 54.4 eV and 55.2 eV in the Se 3d orbital correspond to the Se 3d<sub>5/2</sub> and Se 3d<sub>3/2</sub> states, respectively. These XPS results are consistent with previously reported data for Fe<sub>3</sub>O<sub>4</sub>, FeS, and Fe<sub>7</sub>Se<sub>8</sub>, confirming the desired chemical composition and typical bonding states of the as-prepared crystals.

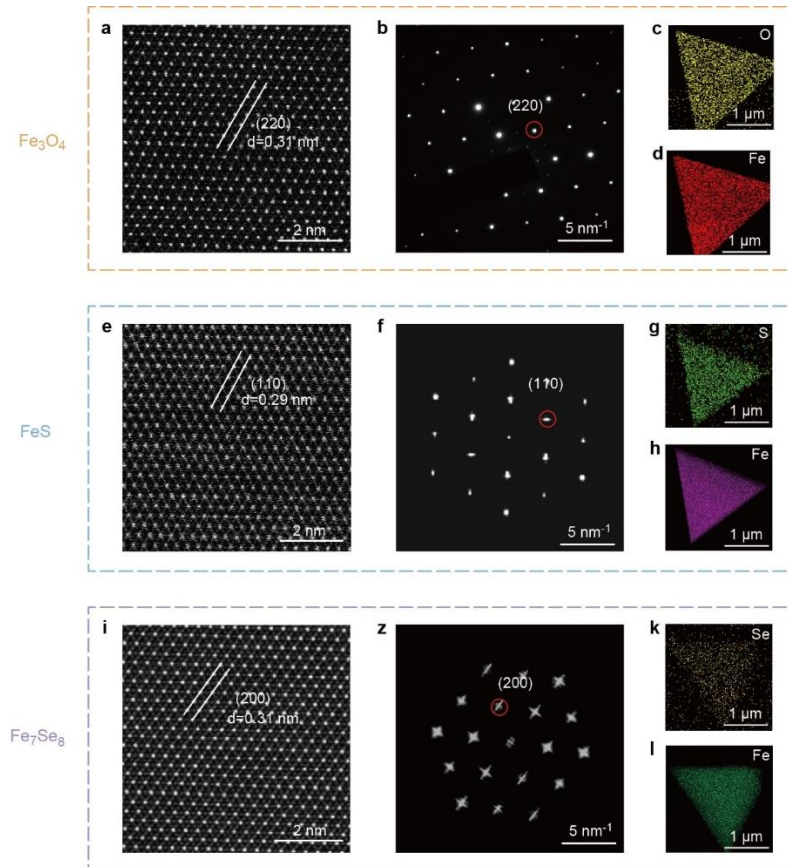

**Supplementary Fig. 4 | Composition and structure of 2D Fe-based crystals. a-d** HRTEM image, SAED pattern, and TEM-EDS elemental maps of an ultrathin Fe<sub>3</sub>O<sub>4</sub> crystals. **e-h** Corresponding characterization of FeS. **i-l** Corresponding characterization of Fe<sub>7</sub>Se<sub>8</sub>.

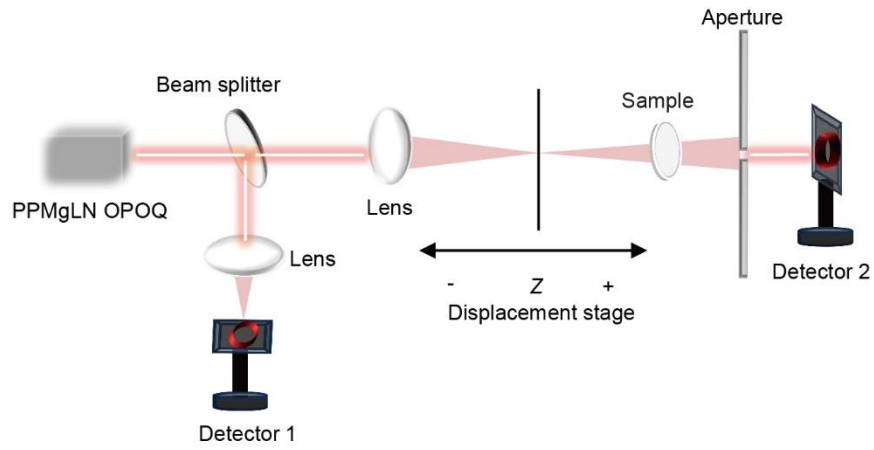

**Supplementary Fig. 5 | Schematic of the open-aperture Z-scan setup.**

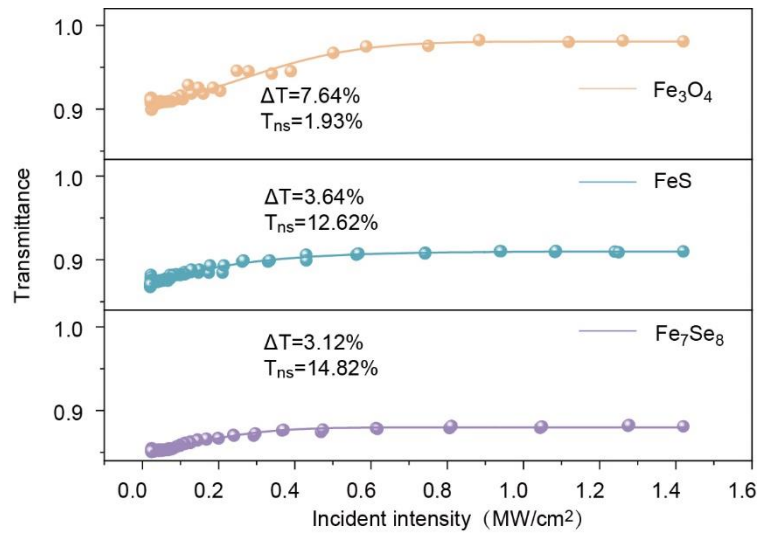

Supplementary Fig. 6 | Normalized transmittance of 2D Fe-based SAs at 2.8 μm.

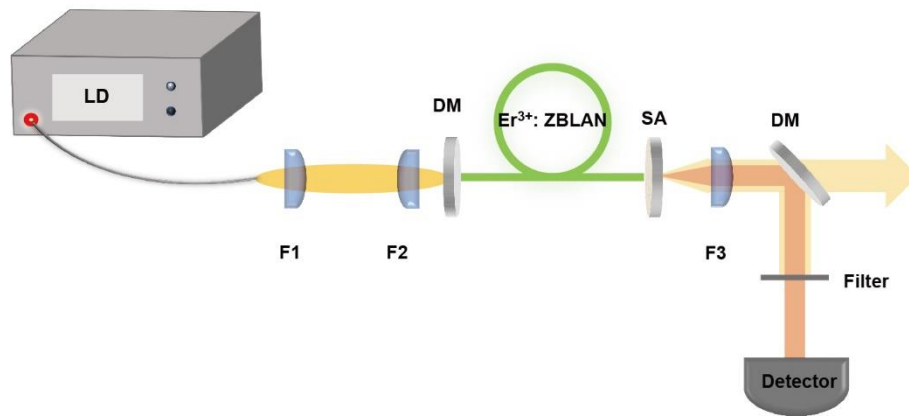

Supplementary Fig. 7 | Schematic of a passively Q-switched Er<sup>3+</sup>: ZBLAN fiber laser using 2D Fe-based SAs.

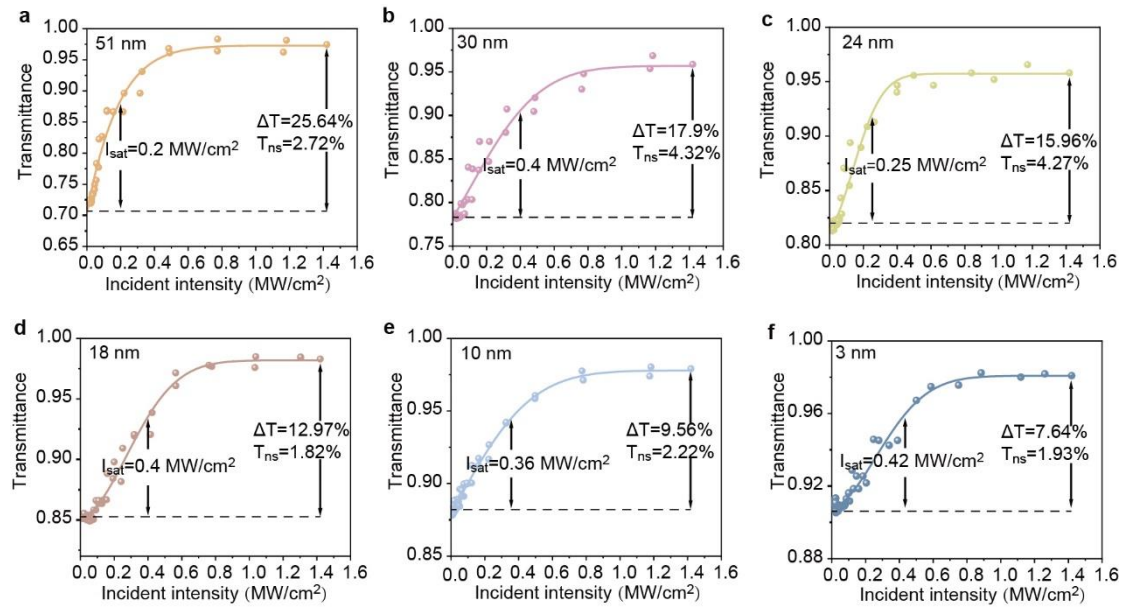

**Supplementary Fig. 8 | Nonlinear absorption curves of Fe<sub>3</sub>O<sub>4</sub> SA with different thicknesses at 2.8  $\mu$ m.**

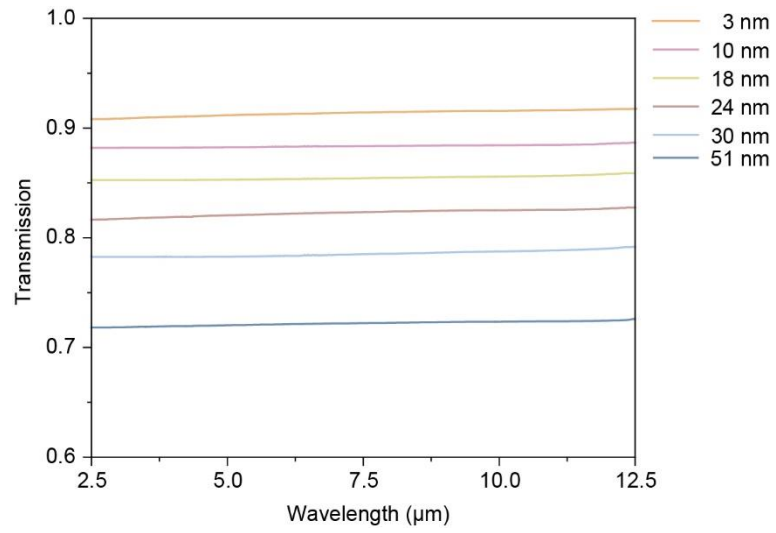

**Supplementary Fig. 9 | Mid-infrared transmission spectra of Fe<sub>3</sub>O<sub>4</sub> SA with different thicknesses (2.5-12.5 μm).**

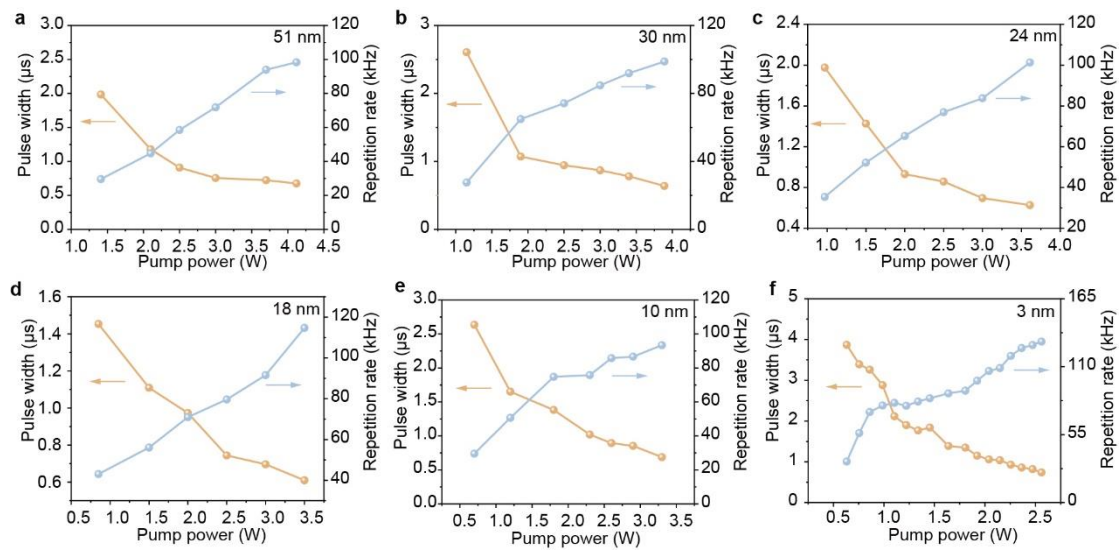

**Supplementary Fig. 10 | Thickness-dependent passive Q-switching characteristics (pulse width and repetition rate) of a  $\text{Fe}_3\text{O}_4$  SA at  $2.8 \mu\text{m}$ .**

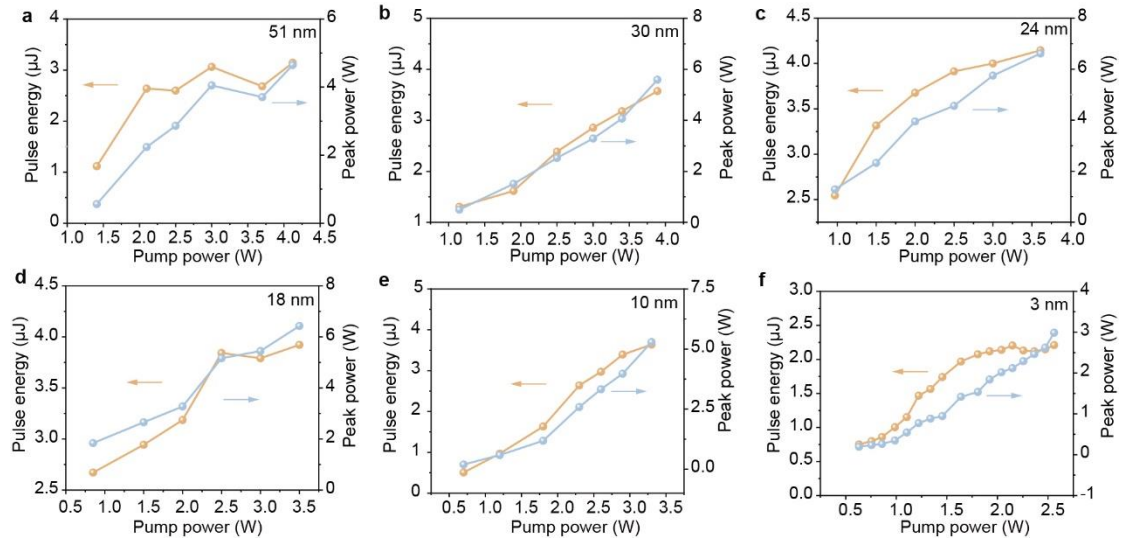

**Supplementary Fig. 11 | Thickness-dependent passive Q-switching characteristics (pulse energy and peak power) of a  $\text{Fe}_3\text{O}_4$  SA at  $2.8 \mu\text{m}$ .**

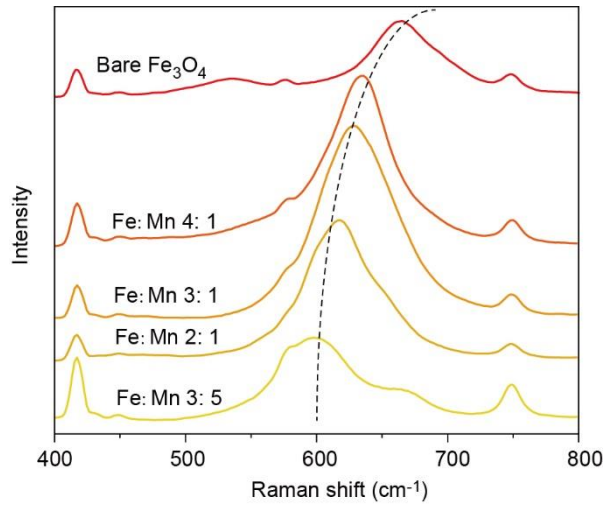

**Supplementary Fig. 12 | Redshift of the A<sub>1g</sub> Raman peak (662 cm<sup>-1</sup>) of bare Fe<sub>3</sub>O<sub>4</sub> as a function of Mn doping concentration.**

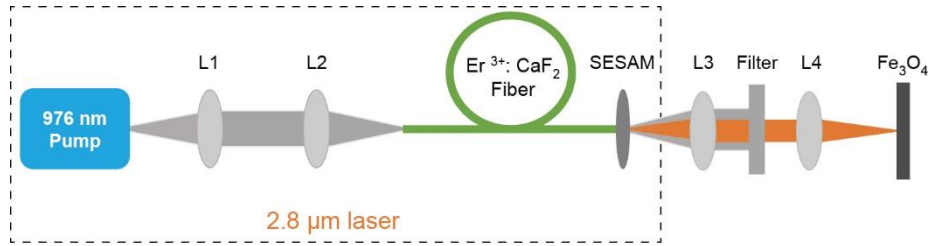

**Supplementary Fig. 13 | Schematic of the experimental setup for laser-induced damage threshold test.**

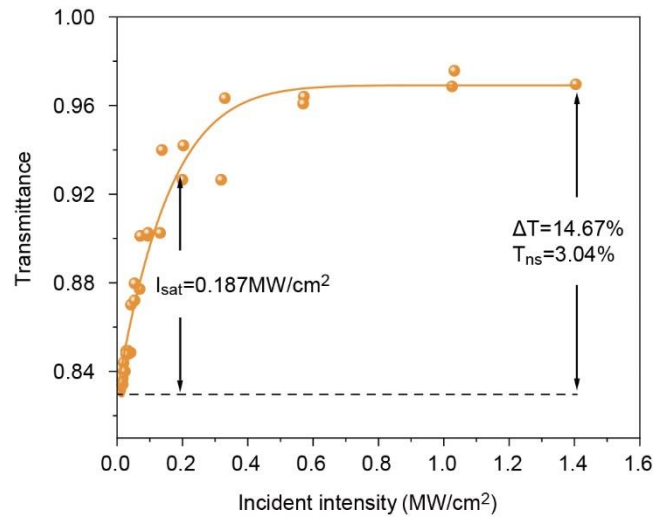

**Supplementary Fig. 14 | Nonlinear absorption curves of Mn-Fe<sub>3</sub>O<sub>4</sub> at 2.8 μm.**
