# Supplementary material
Source: Research Square preprint supplement (doi:10.21203/rs.3.rs-9365145/v1)
Supplement: Supplementary file 2 [file dc03225de5116abbf166ea4a.docx]

Supplementary Materials for

**Thermodynamic Optimization of Atomically Thin Iron-Based Compounds for Mid-Infrared Laser Power Scaling**

Yunrou Wu1, 4, Weitao Liu1, 4, Tiantian Yun2, 4, Taifeng Liu3, Feng Feng1, Yanxiang Shi1, Ruoping Li1, Xi Wang1*, Tao Jiang2*, Ke Chen1*

1Henan Key Laboratory of Quantum Materials and Quantum Energy, School of Future Technology, School of Physics and Electronics, Henan University, Kaifeng 475004, China.

2MOE Key Laboratory of Advanced Micro-Structured Materials, Shanghai Frontiers Science Center of Digital Optics, Institute of Precision Optical Engineering, and School of Physics Science and Engineering, Tongji University, Shanghai 200092, China.

3National & Local Joint Engineering Research Center for Applied Technology of Hybrid Nanomaterials, Henan University, Kaifeng 475004, China.

4These authors contributed equally to this work.

*Corresponding authors. Email: kchen@henu.edu.cn (K.C.); tjiang@tongji.edu.cn (T.J.); wangxi0426@henu.edu.cn (X.W.)

**This file includes:**

Supplementary Figs. 1 to 14


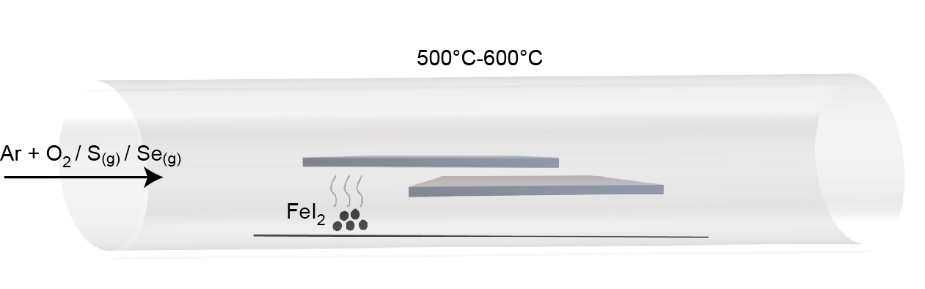


**Supplementary Fig. 1 | Schematic illustration of the synthesis process for 2D Fe-based crystals.**


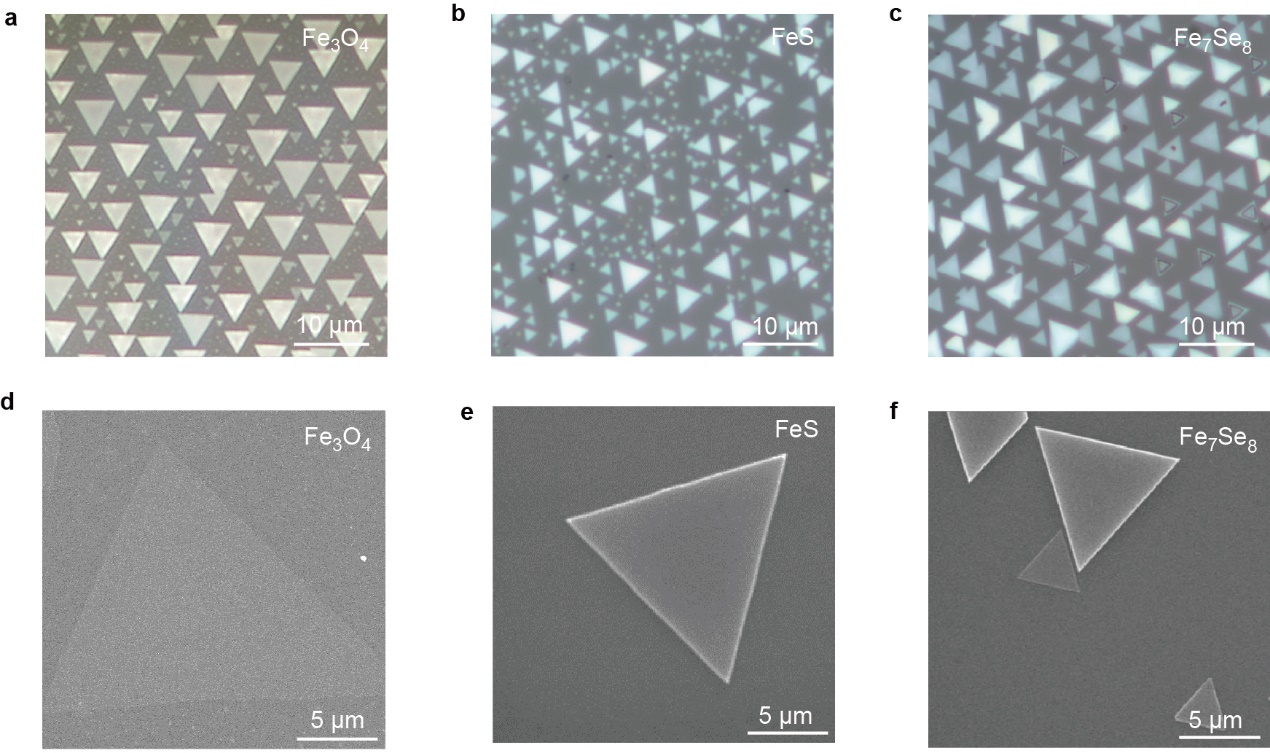


**Supplementary Fig. 2 | Morphology of synthesized 2D Fe-based crystals.** **a-c** OM and **d-f** SEM images of Fe3O4, FeS, and Fe7Se8, respectively.


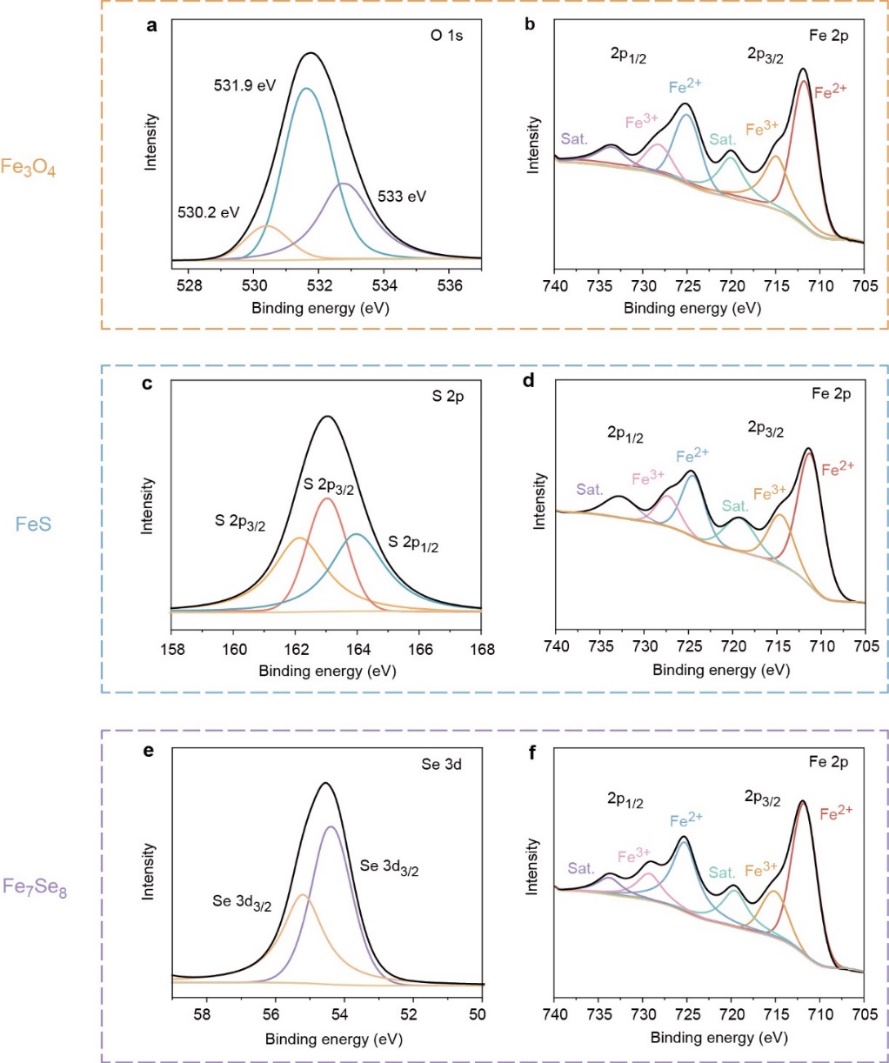


**Supplementary Fig. 3 | XPS analysis of 2D Fe-based crystals. a-b** Fe 2p and O 1s spectra of Fe3O4; **c-d** Fe 2p and S 2p spectra of FeS; **e-f** Fe 2p and Se 3d spectra of Fe7Se8.

The bonding states and composition of the 2D Fe-based (Fe3O4, FeS, Fe7Se8) crystals were further confirmed by X-ray photoelectron spectroscopy (XPS), as shown in Figure S3. The binding energies at ~725.9 and ~712.3 eV correspond to Fe3+, while the peaks at ~722.9 and ~709.8 eV are assigned to Fe2+, consistent with previously reported XPS characteristics of 2D Fe3O4, FeS and Fe7Se8 crystals. For Fe3O4, three distinct peaks located at 530.33, 531.63, and 532.73 eV confirm the presence of O 1s. For FeS, the peaks at 163.95 eV and 162.1 eV in the S 2p orbital are attributed to the S 2p1/2 and S 2p3/2 states, respectively. In Fe7Se8, the peaks at 54.4 eV and 55.2 eV in the Se 3d orbital correspond to the Se 3d5/2 and Se 3d3/2 states, respectively. These XPS results are consistent with previously reported data for Fe3O4, FeS, and Fe7Se8, confirming the desired chemical composition and typical bonding states of the as-prepared crystals.


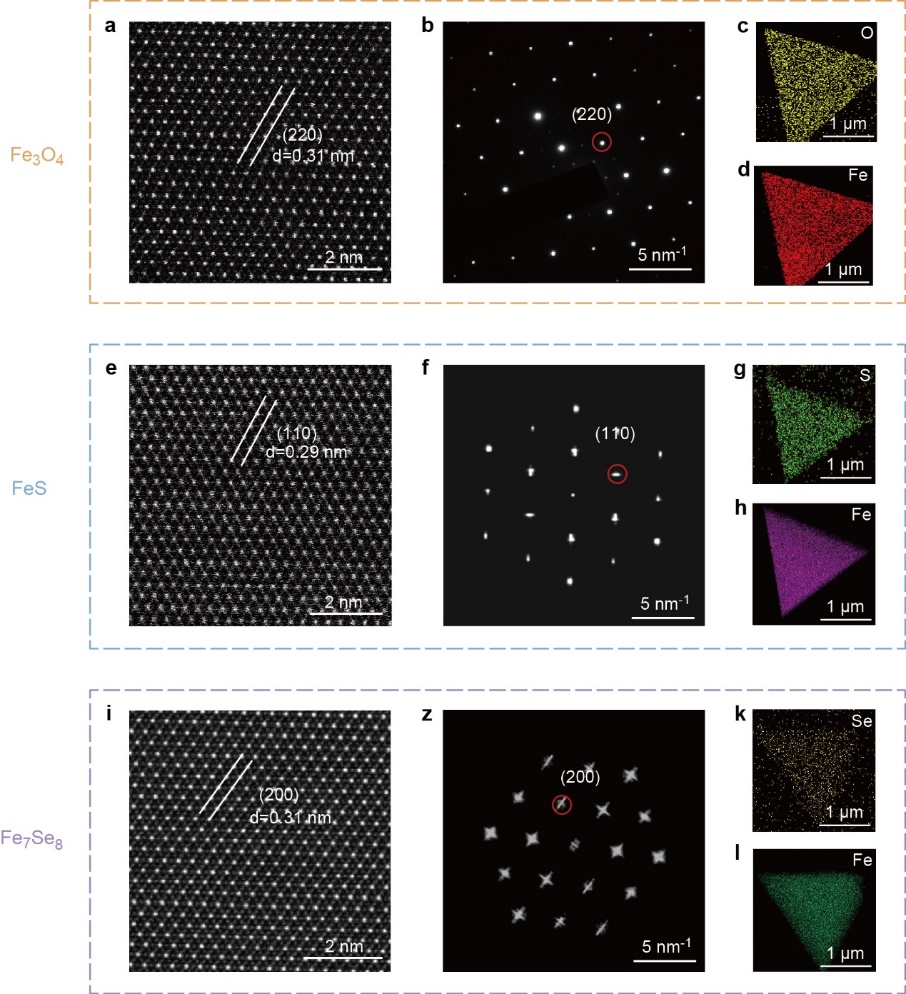


**Supplementary Fig. 4** **| Composition and structure of 2D Fe-based crystals. a-d** HRTEM image, SAED pattern, and TEM-EDS elemental maps of an ultrathin Fe3O4 crystals. **e-h** Corresponding characterization of FeS. **i-l** Corresponding characterization of Fe7Se8.


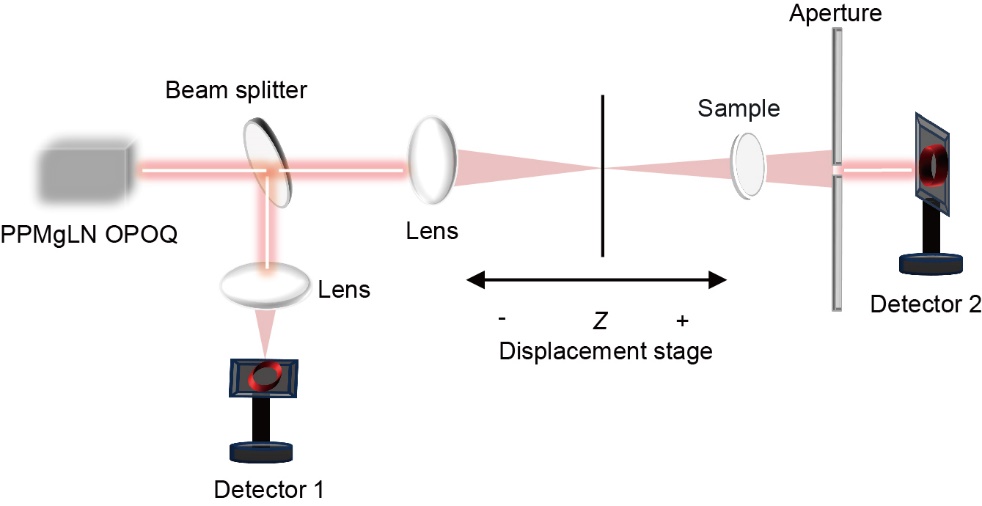


**Supplementary Fig. 5 | Schematic of the open-aperture Z-scan setup.**


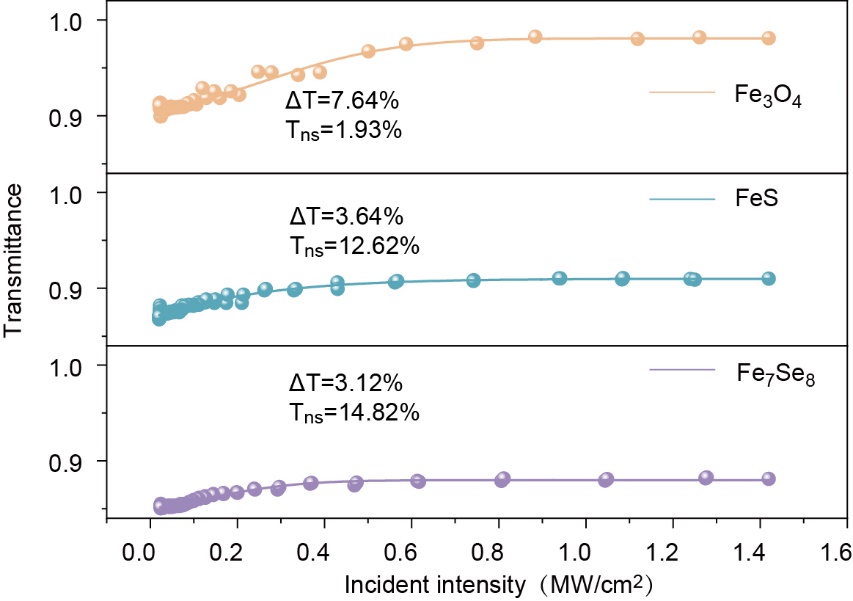


**Supplementary Fig. 6 | Normalized transmittance of 2D Fe-based SAs at 2.8 μm.**


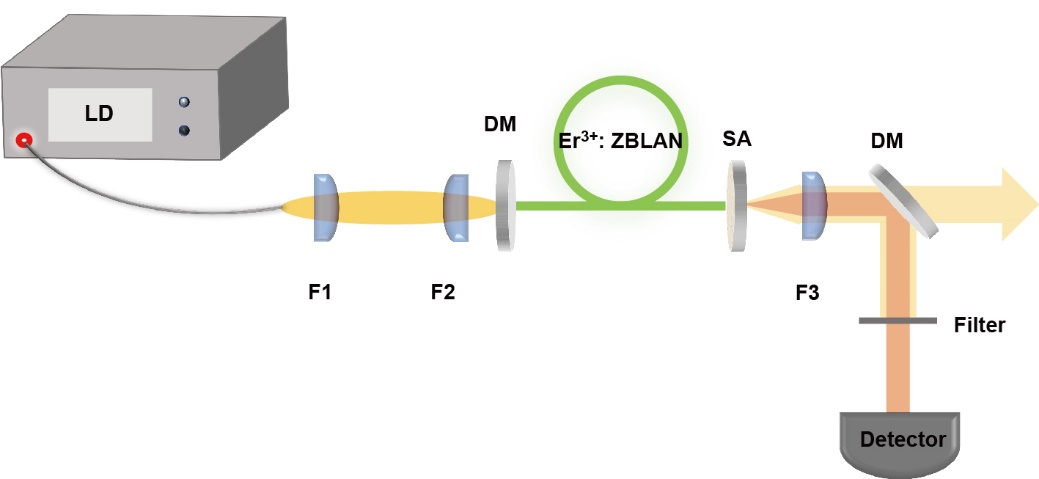


**Supplementary Fig. 7 | Schematic of a passively Q-switched Er3+: ZBLAN fiber laser using 2D Fe-based SAs.**


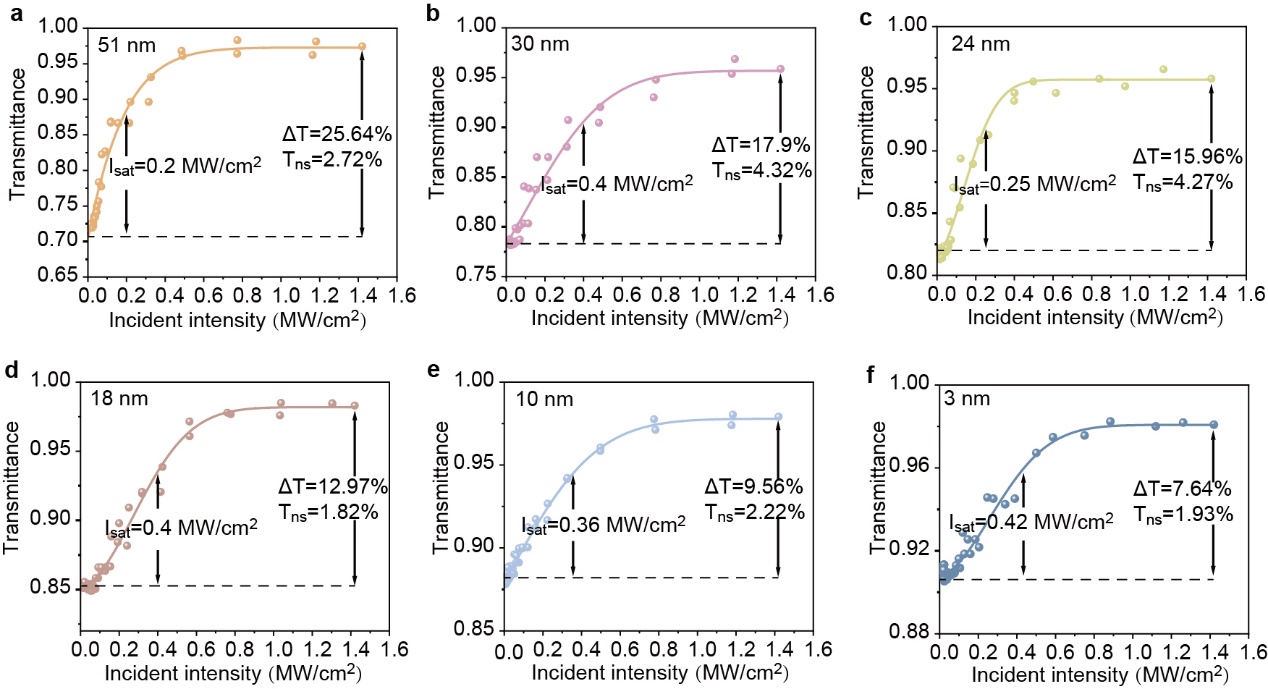


**Supplementary Fig. 8 | Nonlinear absorption curves of Fe3O4 SA with different thicknesses at 2.8 μm.**


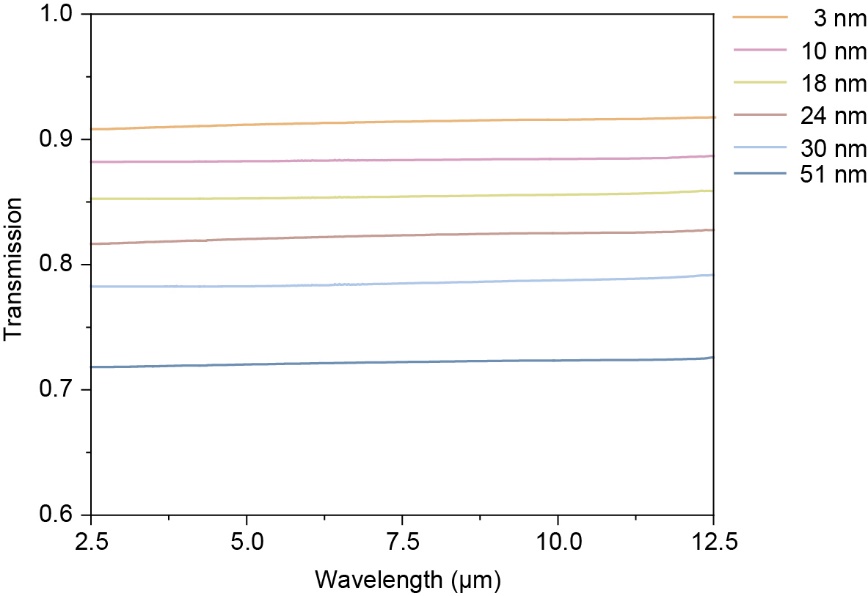


**Supplementary Fig. 9 | Mid-infrared transmission spectra of Fe3O4 SA with different thicknesses (2.5-12.5** **μm).**


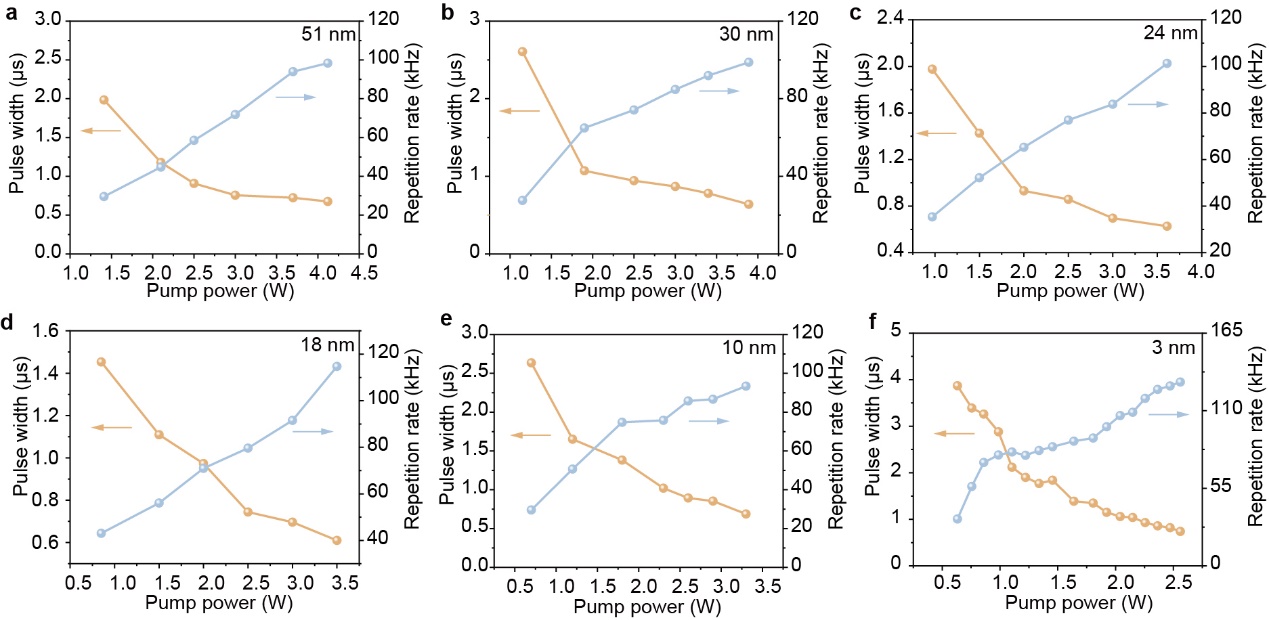


**Supplementary Fig. 10 | Thickness-dependent passive Q-switching characteristics (pulse width and repetition rate) of a Fe3O4 SA at 2.8 μm.**


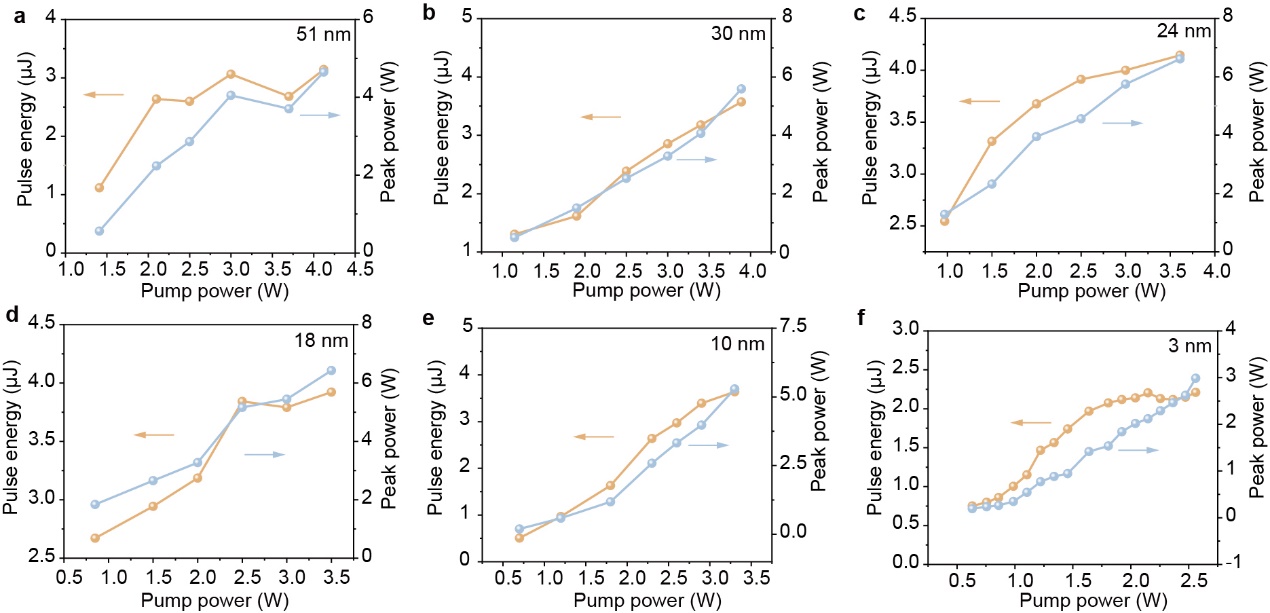


**Supplementary Fig. 11 | Thickness-dependent passive Q-switching characteristics (pulse energy and peak power) of a Fe3O4 SA at 2.8 μm.**


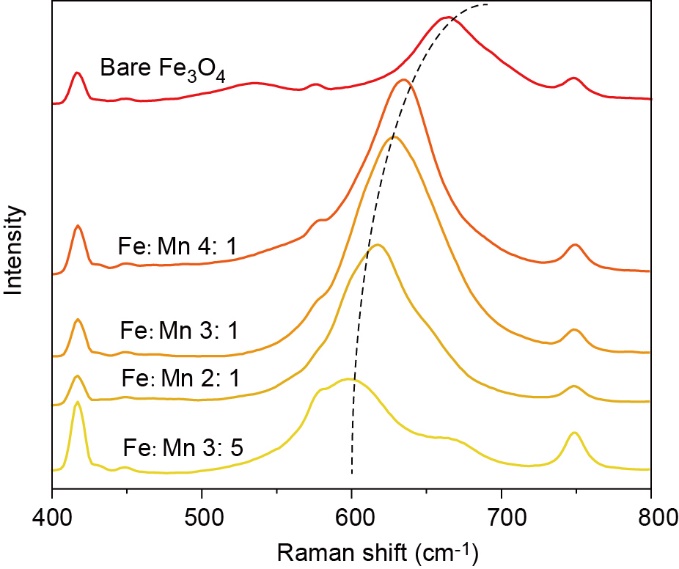


**Supplementary Fig. 12 | Redshift of the A1g Raman peak (662 cm-1) of bare Fe3O4 as a function of Mn doping concentration.**


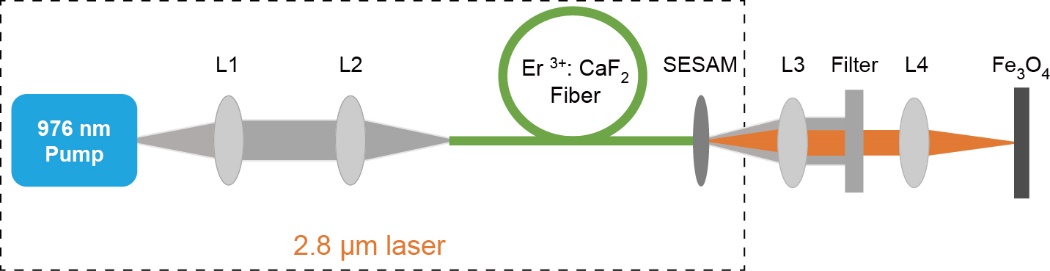


**Supplementary Fig. 13 | Schematic of the experimental setup for laser-induced damage threshold test.**


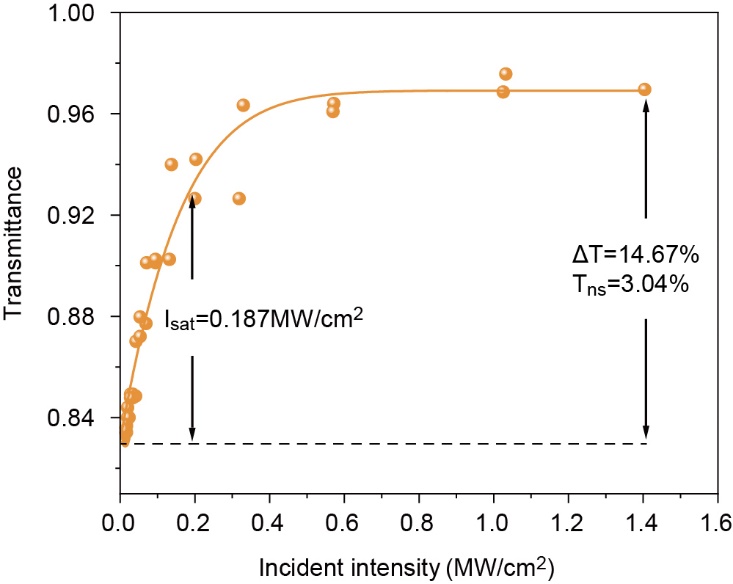


**Supplementary Fig. 14 | Nonlinear absorption curves of Mn-Fe3O4 at 2.8 μm.**
